# Supplementary material for: Adsorption of an Au atom and dimer on a thin θ-Al2O3/NiAl(100) film: dependence on the thickness of the θ-Al2O3 film
Source: Royal Society of Chemistry journal article supplement (doi:10.1039/c7ra13081c), 2018-01-01
Supplement: c7ra13081c1.pdf [file c7ra13081c1.pdf]

## Supporting Information

### **Adsorption of an Au atom and dimer on thin film $\theta$ -Al<sub>2</sub>O<sub>3</sub>/NiAl(100): dependence on the thickness of thin film $\theta$ -Al<sub>2</sub>O<sub>3</sub>**

**Ching-Lun Hsia<sup>a</sup>, Jeng-Han Wang<sup>b,\*</sup>, Meng-Fan Luo<sup>a,\*</sup>**

*<sup>a</sup>Department of Physics, National Central University, 300 Zhongda Road, Zhongli  
32001, Taiwan*

*<sup>b</sup>Department of Chemistry, National Taiwan Normal University, Taipei, Taiwan*

\*Corresponding authors, E-mail: mfl28@phy.ncu.edu.tw (M.F. Luo) and  
jenghan@ntnu.edu.tw (J.H. Wang)

Fig. S1 compares the DOS of Al in the top layer of bulk  $\theta$ -Al<sub>2</sub>O<sub>3</sub> (upper) and the monolayer alumina in model **1L** (lower). The former shows obviously a band gap between HOMO and LUMO, reflecting a feature of insulators; in contrast, the latter shows no band gap — clear DOS exists between energy 2.5 eV and -2.5 eV. The monolayer alumina supported on NiAl(100) has thus a fingerprint of metallic band structures.

Some meta-stable configurations without high symmetry are also found for an Au<sub>2</sub> dimer. Fig. S2(a) exemplifies a meta-stable configuration appearing in models **1L**, **2L**-O-Al, **4L**, and **5L**-O-Al, with  $E_{Au_2}^{ads} = 0.3 \sim 0.6$  eV. The Au dimer is standing at site No.9 and tilting toward site No.3, with a tilting angle 30° relative to the surface normal. Fig. S2(b) shows a meta-stable configuration found in models **1L** and **4L**. The Au dimer is lying flat on the surface with small  $E_{Au_2}^{ads} = 0.3 \sim 0.9$  eV; one Au is located at site No.3 and the other at site No.11. Fig. S2(c) shows a meta-stable configuration appearing only in model **1L**, with  $E_{Au_2}^{ads} = 0.7$  eV. The Au dimer is lying flat on the surface; one of them is bound to the Al atom (on site No.3) and the other located at site No.9.

**Figure S1**

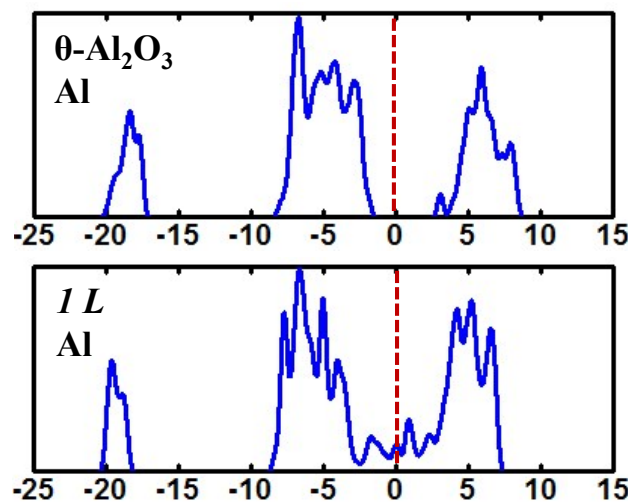

**Fig. S1** Calculated DOS for Al in (a) the top layer of bulk  $\theta$ -Al<sub>2</sub>O<sub>3</sub>(001) and (b) the monolayer alumina in **1L**  $\theta$ -Al<sub>2</sub>O<sub>3</sub>/NiAl(100) (model **1L**), as indicated. The dashed line

in the figure indicate the Fermi energy.

**Figure S2**

**(a) 2L-O-Al**

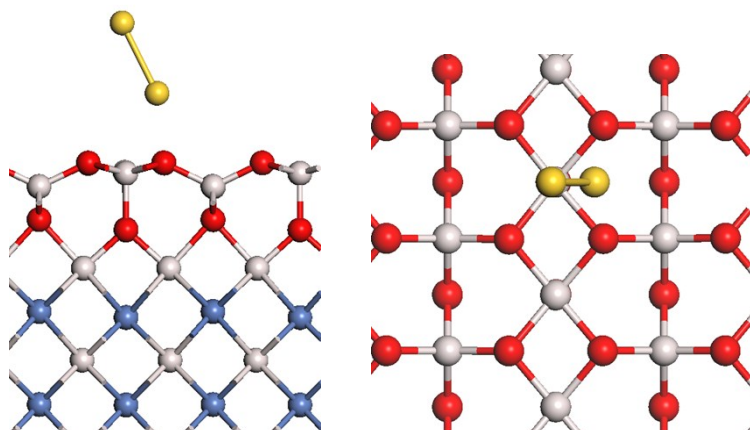

**(b) 4L**

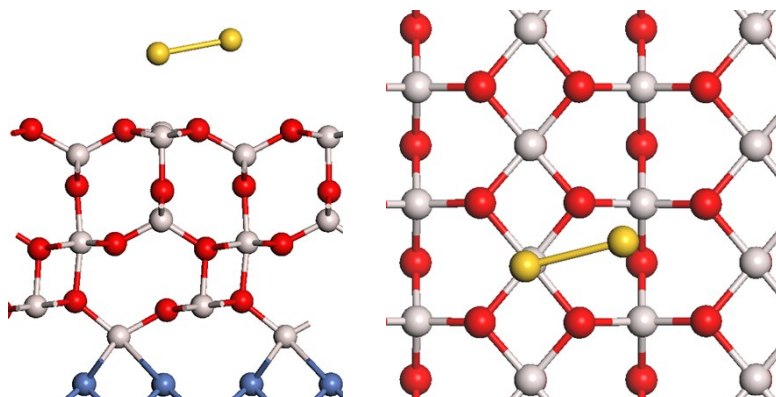

**(c) 1L**

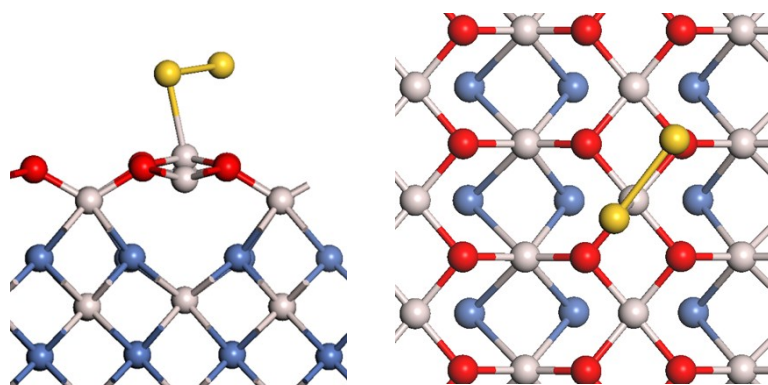

**Fig. S2** Schematic diagrams showing side (left) and top views (right) for an Au dimer

adsorbed in a meta-stable configuration on  $\theta$ -Al<sub>2</sub>O<sub>3</sub>/NiAl(100) surfaces in models (a) **2L**-O-Al, (b) **4L** and (c) **1L**. Red, grey and blue spheres denote O, Al and Ni atoms, respectively; yellow spheres denote adsorbed Au dimers.
